# Supplementary material for: High-performance electrofluorochromic devices based on aromatic polyamides with AIE-active tetraphenylethene and electro-active triphenylamine moieties
Source: Royal Society of Chemistry journal article supplement (doi:10.1039/c8py00809d), 2018-01-01
Supplement: c8py00809d1.pdf [file c8py00809d1.pdf]

## Supplementary Information

### High-Performance Electrofluorochromic Devices Based on Aromatic Polyamides with AIE-active Tetraphenylethene and Electro-active Triphenylamine Moieties

*Shun-Wen Cheng,<sup>a</sup> Ting Han,<sup>b</sup> Teng-Yung Huang,<sup>a</sup> Ben-Zhong Tang<sup>\*b</sup> and Guey-Sheng Liou<sup>\*a</sup>*

S. W. Cheng, T. Y. Huang, Prof. G. S. Liou.

Functional Polymeric Materials Laboratory, Institute of Polymer Science and Engineering, National Taiwan University, 1 Roosevelt Road, 4th Sec., Taipei City 10617, Taiwan

E-mail: [gслиou@ntu.edu.tw](mailto:gслиou@ntu.edu.tw)

Dr. T. Han, Prof. B. Z. Tang.

Department of Chemistry, The Hong Kong University of Science & Technology, Clear Water Bay, Kowloon, Hong Kong, China

E-mail: [tangbenz@ust.hk](mailto:tangbenz@ust.hk)

#### List of Contents for Supplementary Information:

---

|                                                                                                                                               |    |
|-----------------------------------------------------------------------------------------------------------------------------------------------|----|
| <b>Preparation of the polyamide TPA-OMe-TPE</b> .....                                                                                         | 2  |
| <b>Scheme S1.</b> Synthetic scheme of polyamide TPA-OMe-TPE. ....                                                                             | 2  |
| <b>Table S1</b> Thermal Properties of TPA-OMe-TPE .....                                                                                       | 3  |
| <b>Table S2</b> Inherent viscosity and molecular weight of TPA-OMe-TPE .....                                                                  | 4  |
| <b>Table S3</b> Solubility behavior of TPA-OMe-TPE .....                                                                                      | 5  |
| <b>Figure S1</b> IR spectrum of TPA-OMe-TPE.....                                                                                              | 6  |
| <b>Figure S2</b> <sup>1</sup> H NMR spectrum of TPA-OMe-TPE.....                                                                              | 7  |
| <b>Figure S3</b> TGA traces of TPA-OMe-TPE in N <sub>2</sub> and in air.....                                                                  | 8  |
| <b>Figure S4</b> DSC trace of TPA-OMe-TPE. ....                                                                                               | 9  |
| <b>Figure S5</b> Photographs of the NMP solutions and solid films of the prepared polyamides taken under illumination of 365 nm UV light..... | 10 |

---

### Preparation of polyamide (TPA-OMe-TPE)

A mixture of 0.31 g (1.0 mmol) of 4,4'-diamino-4''-methoxytriphenylamine, 0.42 g (1.0 mmol) of 4,4'-(1,2-diphenylethene-1,2-diyl)dibenzoic acid, 0.13 g of calcium chloride, 1.0 mL of triphenyl phosphite (TPP), 0.3 mL of pyridine, and 1.0 mL of NMP was heated with stirring at 105 °C for 3 h. The polymer solution was then poured slowly into 300 mL of stirring methanol. The resulting stringy and fiber-like precipitates were collected by filtration, washed thoroughly with hot water and methanol successively, and dried under vacuum at 100 °C. Reprecipitation was carried out twice by pouring the DMAc solution of the polymer product into stirring methanol for further purification. The inherent viscosity, weight-average molecular weights ( $M_w$ ), and polydispersity index (PDI) of the obtained polyamide **TPA-OMe-TPE** were 0.31 dL/g (measured at a concentration of 0.5 g/dL in DMAc at 30 °C), 19,000 daltons, and 1.96, respectively. The FT-IR spectrum of **TPA-OMe-TPE** (film) exhibited characteristic amide absorption bands at 3320  $\text{cm}^{-1}$  (N-H stretching) and 1500  $\text{cm}^{-1}$  (N-H bending), 1657  $\text{cm}^{-1}$  (amide carbonyl), 2920  $\text{cm}^{-1}$  (C-H stretching), and 1240  $\text{cm}^{-1}$  (C-N stretching).  $^1\text{H}$  NMR (400 MHz, DMSO- $d_6$ ,  $\delta$ , ppm): 10.13-10.06 (s, 2H), 7.81-7.69 (d, 4H), 7.66-7.56 (d, 4H), 7.23-7.07 (m, 10H), 7.07-6.92 (d, 4H), 6.90-6.82 (m, 8H), 3.77-3.67 (s, 3H).

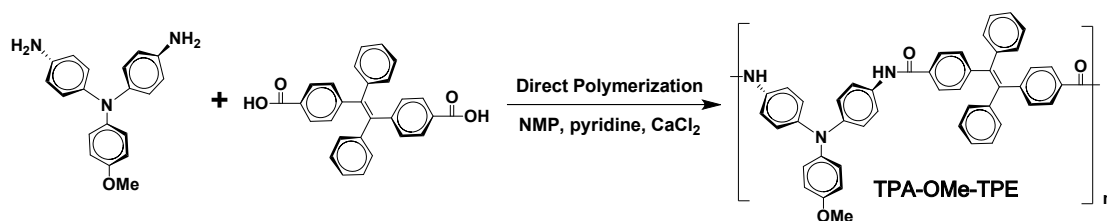

**Scheme S1.** Synthetic scheme of polyamide **TPA-OMe-TPE**.

**Table S1.** Thermal Properties of TPA-OMe-TPE<sup>a</sup>

| Polymer <sup>a</sup> | T <sub>g</sub> <sup>b</sup><br>(°C) | T <sub>d</sub> at 5 % weight loss (°C) <sup>c</sup> |     | T <sub>d</sub> at 10 % weight loss (°C) <sup>c</sup> |     | Char yield (%) <sup>d</sup> |
|----------------------|-------------------------------------|-----------------------------------------------------|-----|------------------------------------------------------|-----|-----------------------------|
|                      |                                     | N <sub>2</sub>                                      | Air | N <sub>2</sub>                                       | Air |                             |
| TPA-OMe-TPE          | 230                                 | 455                                                 | 430 | 505                                                  | 475 | 67                          |

<sup>a</sup> The polymer film samples were heated at 250 °C for 1 h prior to all the thermal analyses.

<sup>b</sup> Midpoint temperature of baseline shift on the second DSC heating trace (rate: 20 °C /min) of the sample after quenching from 400 °C to 50 °C (rate: 200 °C /min) under nitrogen.

<sup>c</sup> Temperature at which 5 % and 10% weight loss occurred, respectively, recorded by TGA at a heating rate of 20 °C/min and a gas flow rate of 20 cm<sup>3</sup>/min.

<sup>d</sup> Residual weight percentages at 800 °C under nitrogen flow.

**Table S2.** Inherent Viscosity and Molecular Weight of **TPA-OMe-TPE**

| Polymer            | $\eta_{inh}^a$ (dL/g) | $M_w^b$ | $M_n^b$ | PDI <sup>c</sup> |
|--------------------|-----------------------|---------|---------|------------------|
| <b>TPA-OMe-TPE</b> | 0.31                  | 19000   | 9700    | 1.96             |

<sup>a</sup> Measured at a polymer concentration of 0.5 g/dL in DMAc at 30 °C.

<sup>b</sup> Calibrated with polystyrene standards, using NMP as the eluent at a constant flow rate of 0.5 mL/min at 40 °C.

<sup>c</sup> Polydispersity Index ( $M_w/M_n$ ).

**Table S3.** Solubility Behavior of **TPA-OMe-TPE**

| Polymer            | Solubility in various solvent <sup>a</sup> |      |     |     |                   |      |                  |
|--------------------|--------------------------------------------|------|-----|-----|-------------------|------|------------------|
|                    | NMP                                        | DMAc | DMF | THF | CHCl <sub>3</sub> | DMSO | <i>m</i> -cresol |
| <b>TPA-OMe-TPE</b> | ++                                         | ++   | +   | ++  | ++                | ++   | +                |

<sup>a</sup> Qualitative solubility was tested with 10 mg of a sample in 1 mL of solvent. ++, soluble at room temperature; +, soluble on heating; -, insoluble even on heating.

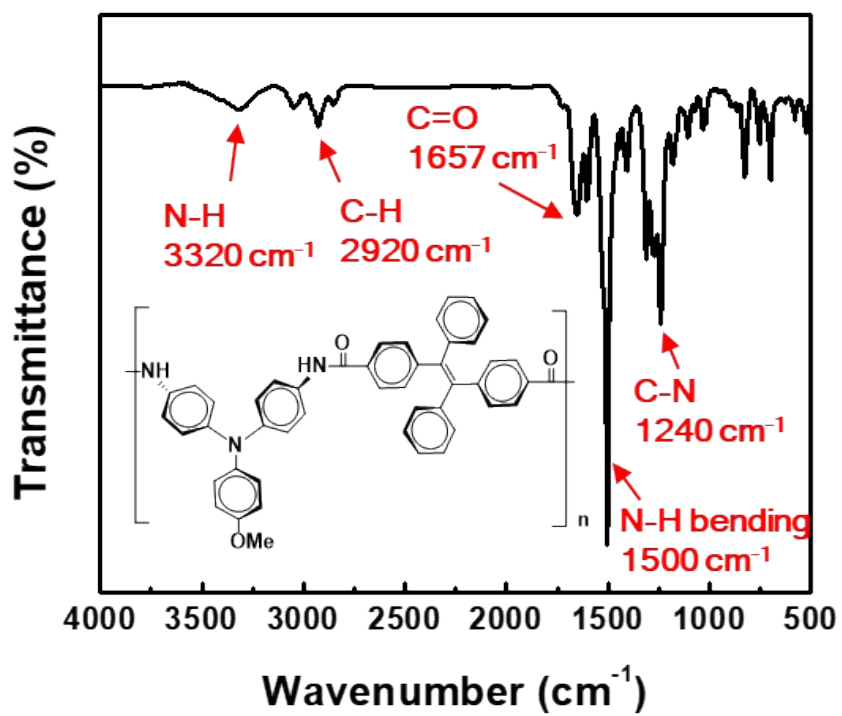

Figure S1 IR spectrum of TPA-OMe-TPE.

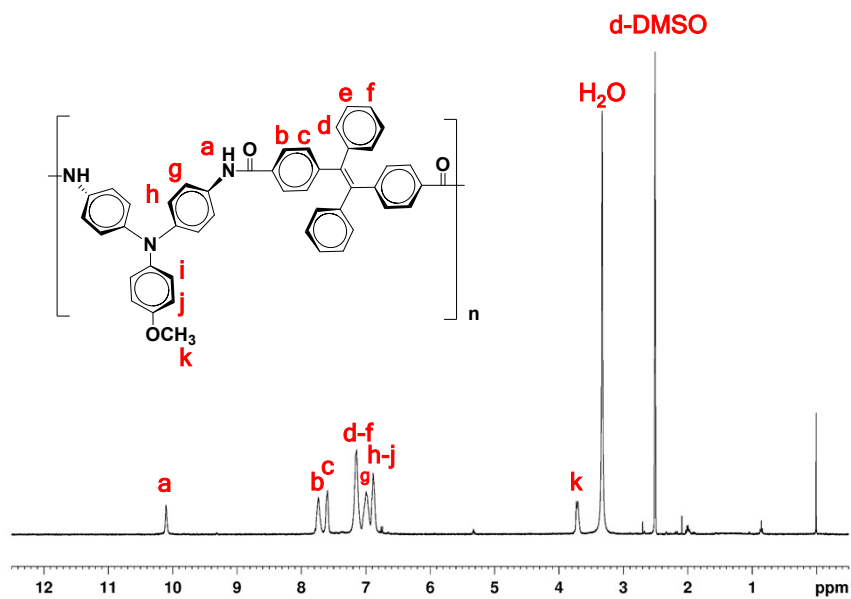

Figure S2 <sup>1</sup>H NMR spectrum of TPA-OMe-TPE.

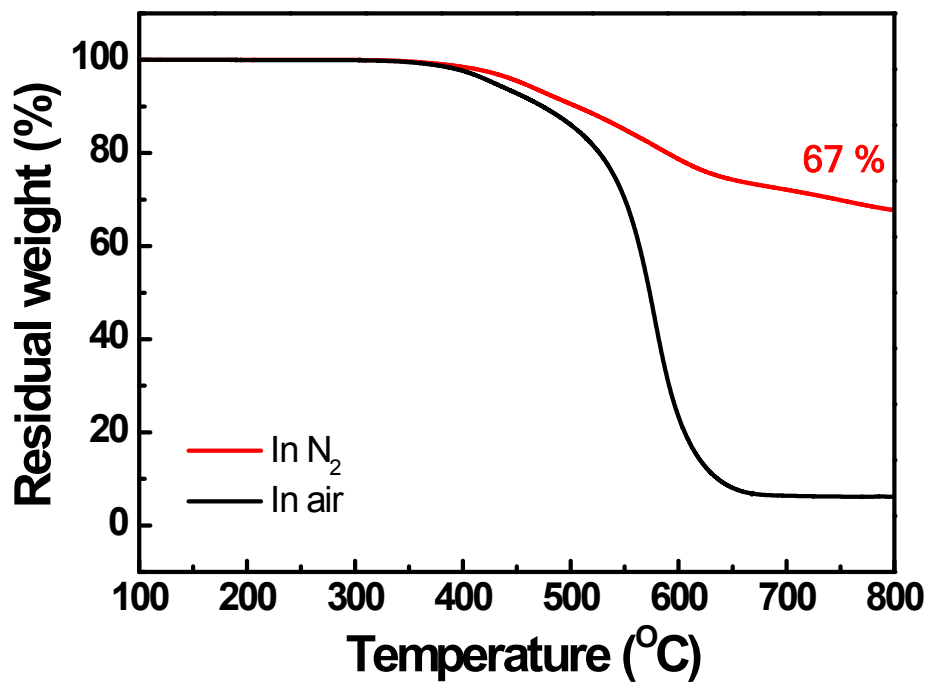

Figure S3 TGA traces of TPA-OMe-TPE in N<sub>2</sub> and in air.



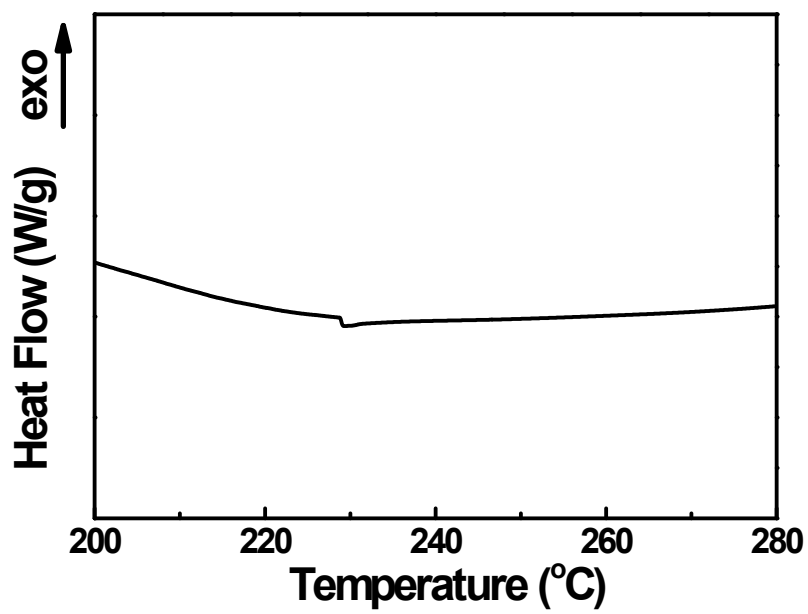

Figure S4 DSC trace of TPA-OMe-TPE.

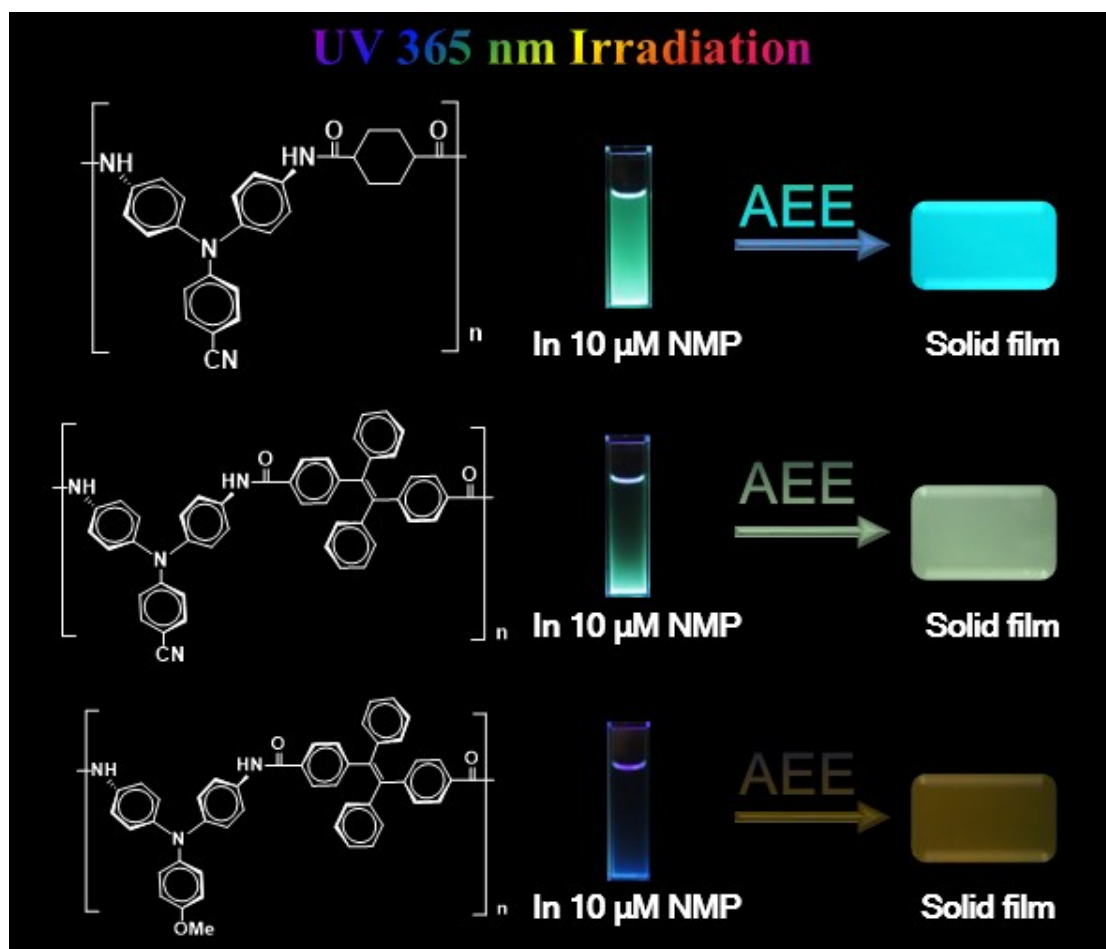

**Figure S5** Photographs of the NMP solutions and solid films of the prepared polyamides taken under illumination of 365 nm UV light.
